# Supplementary material for: MRE11 and TREX1 control senescence by coordinating replication stress and interferon signaling
Source: PubMed Central journal article supplement (PMC11208572; doi:10.1038/s41467-024-49740-w), 2024-06-26
Supplement: 41467_2024_49740_MOESM1_ESM.pdf [file 41467_2024_49740_MOESM1_ESM.pdf]

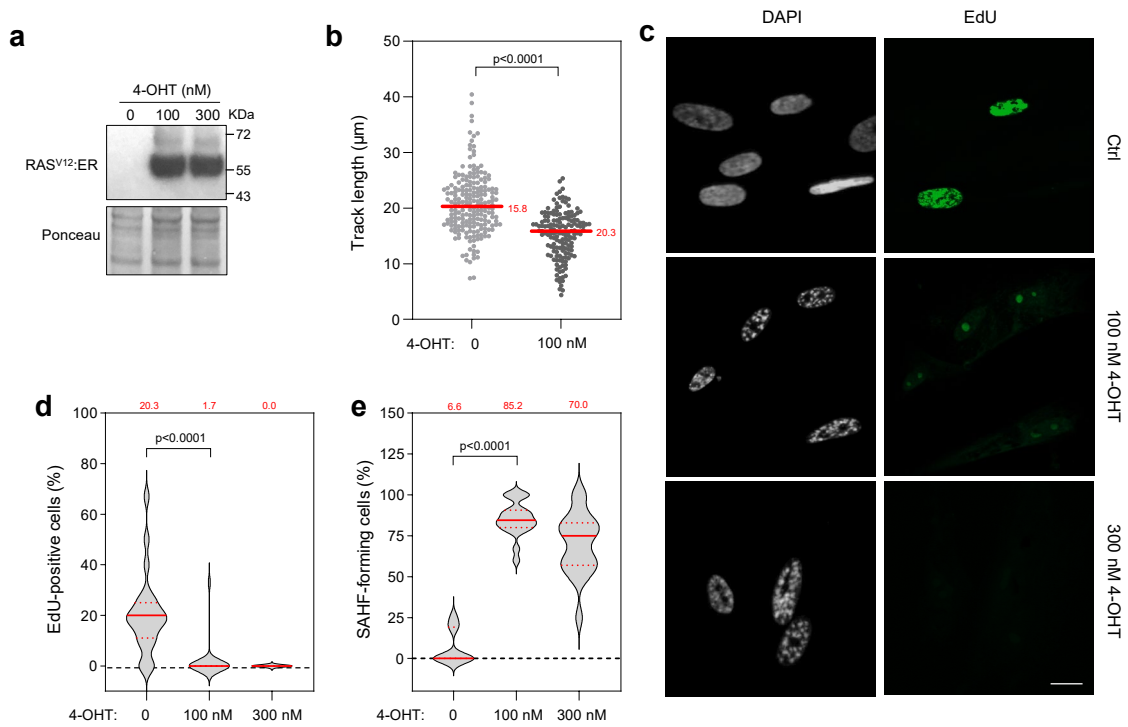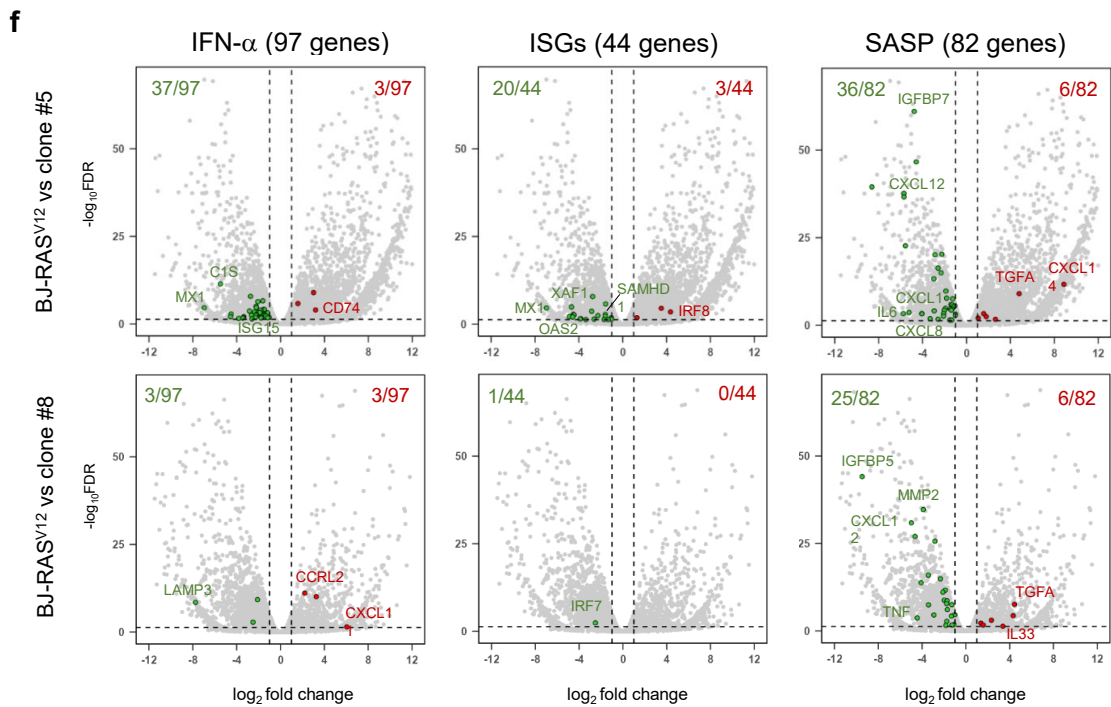

## Supplementary Figure legends

**Supplementary Fig. 1 H-RAS<sup>V12</sup> induction triggers senescence and induces the expression of ISG and SASP genes.** **a** Human telomerase-immortalized lung fibroblasts hTERT-IMR90 harboring H-RAS<sup>V12</sup> fused to an estrogen receptor were treated with different concentrations of 4-hydroxytamoxifen (4-OHT) for 6 days. Induction of H-RAS<sup>V12</sup>:ER was detected by Western blotting. **b** Replication fork progression was monitored by DNA fiber spreading on day 6 after 4-OHT treatment. The median IdU+CldU track length is indicated in red. A minimum of 150 fibers were measured. A representative experiment is shown (n=3). The p value was determined using two-tailed Mann-Whitney rank sum test. **c** Inhibition of DNA replication by H-RAS<sup>V12</sup> was quantified by EdU click chemistry. Representative images of EdU incorporation are shown (n=3). Scale bar: 10  $\mu$ m. **d** Percentage of EdU-positive cells was quantified. The p value was determined using two-tailed Mann-Whitney rank sum test. A minimum of 200 cells were measured. A representative experiment is shown (n=2). **e** SAHF formation were quantified by DAPI staining on day 6 after 4-OHT treatment.  $p < 0.0001$ , two-tailed Mann-Whitney rank sum test. A representative experiment is shown (n=3). **f** Volcano plots of differentially expressed IFN- $\alpha$ , ISG and SASP genes in BJ-RAS<sup>V12</sup> fibroblasts. Differential gene expression in senescent Dox-induced BJ-RAS<sup>V12</sup> fibroblasts and in BJ-RAS<sup>V12</sup> clones #5 and #8 is shown. Clone #5 escaped senescence by overexpressing Claspin and Timeless<sup>11</sup>. Clone #8 escaped senescence independently of Claspin and Timeless overexpression<sup>11</sup>. RNA-seq data (biological duplicates) were processed as indicated in Fig.1c.

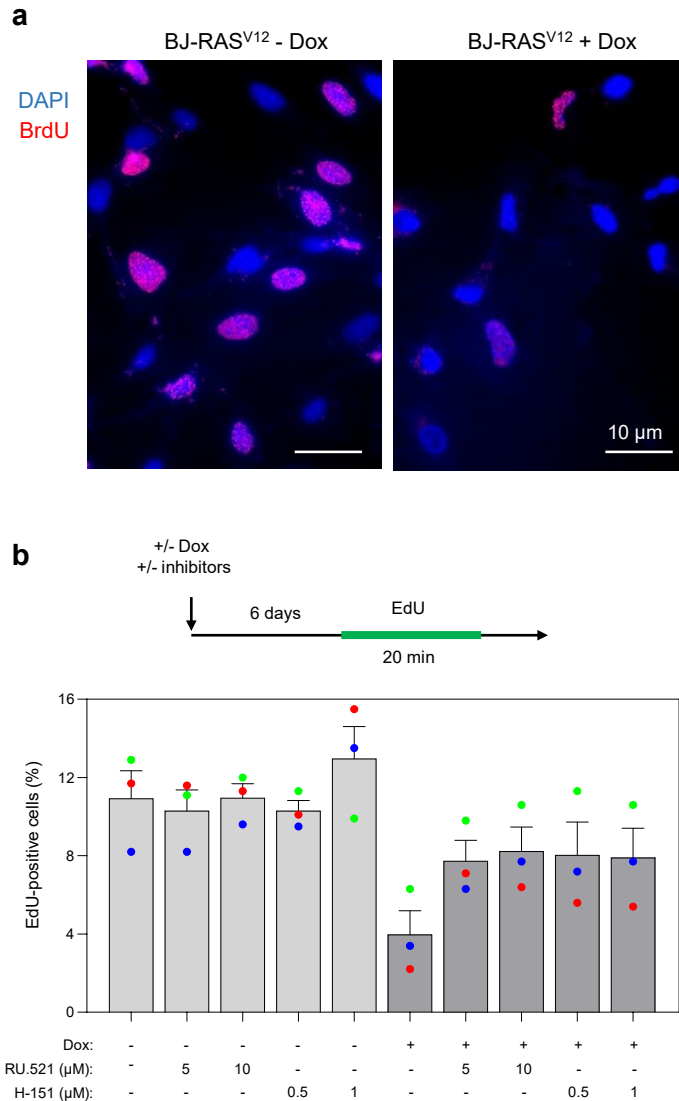

**Supplementary Fig. 2 cGAS and STING inhibitors counteract RAS<sup>V12</sup>-induced replication inhibition.** **a** Representative images of BrdU incorporation upon RAS<sup>V12</sup> induction in BJ fibroblasts. **b** BJ-RAS<sup>V12</sup> fibroblasts were treated or not with 10 µg/ml doxycycline and with increasing doses of cGAS and STING inhibitors (RU.521 and H-151, respectively) for 6 days. The cells were then pulse labeled with 10 µM EdU for 20 minutes. The percentage of cells in S phase was analyzed using EdU click chemistry and flow cytometry. Mean and SEM are presented for three independent experiments.

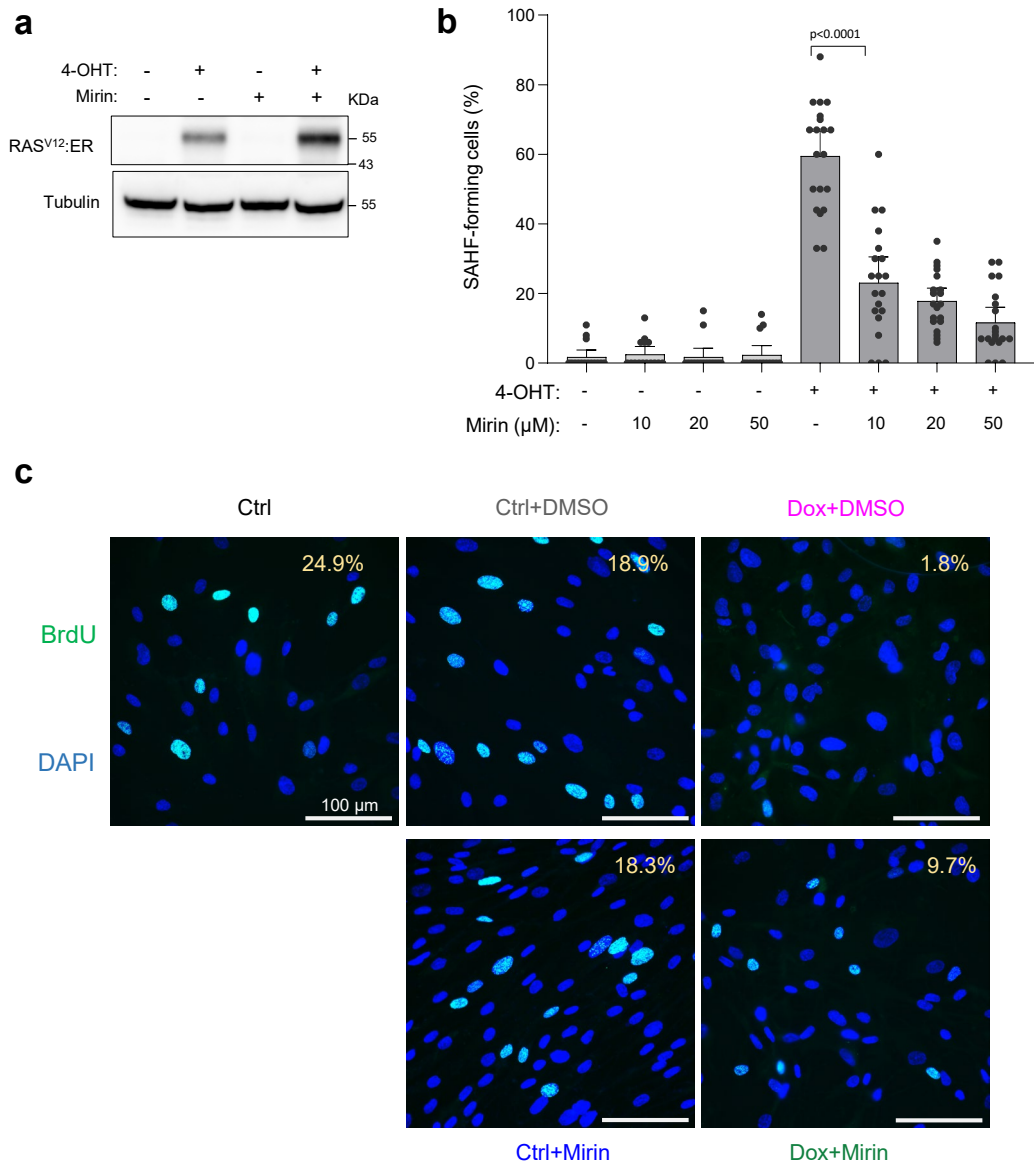

**Supplementary Fig. 3 Mirin suppresses OIS in human fibroblasts.** **a** IMR90-ER/RAS<sup>V12</sup> fibroblasts were treated or not with 100 nM 4-hydroxytamoxifen (4-OHT) and 20 μM Mirin for 6 days. RAS<sup>V12</sup>:ER expression was detected by Western blotting. **b** Mirin prevents the formation of RAS<sup>V12</sup>-induced senescence-associated heterochromatin foci (SAHF). IMR90-ER/RAS<sup>V12</sup> fibroblasts were treated or not with 100 nM 4-hydroxytamoxifen (4-OHT) and increasing doses of Mirin for 6 days. The percentage of SAHF was quantified by DAPI staining.  $p < 0.0001$ , two-tailed Mann-Whitney rank sum test. Ten images in each sample were collected. A minimum of 200 cells were monitored. A representative experiment is shown here (n=2). The p value was determined using two-tailed Mann-Whitney rank sum test. **c** Analysis of BrdU incorporation. Cells were treated with Mirin five days post-RAS<sup>V12</sup> induction (+ Dox) for three days. DAPI is in blue, and BrdU is in green. Scale bar is 100 μm. The percentage of BrdU positive-cells is indicated.

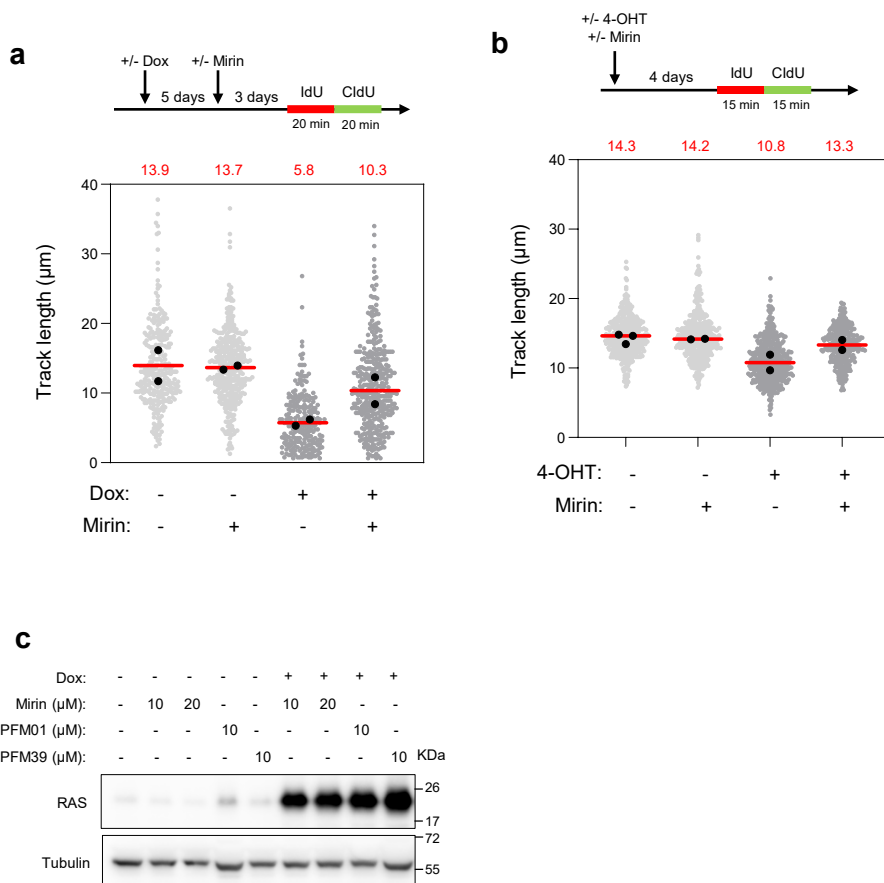

**Supplementary Fig. 4 Mirin suppresses replication stress in BJ-RAS<sup>V12</sup> fibroblasts. a** DNA fiber analysis of fork progression in BJ-RAS<sup>V12</sup> cells treated or not with Dox for 8 days and treated with or without 10 µM Mirin for the last 3 days of Dox induction. The median of IdU+CldU track length of two independent experiments is shown in red. A minimum of 150 fibers were measured in each sample and each biological replicates (n=2). **b** Mirin restores RAS<sup>V12</sup>-induced fork slowing in IMR90-ER/RAS<sup>V12</sup> fibroblasts. Cells were treated with or without 100 nM 4-hydroxytamoxifen and 20 µM Mirin for 4 days. Replication fork progression was measured by DNA fiber spreading as described. The median of IdU+CldU track length of two independent experiments is indicated in red. A minimum of 150 fibers were measured in each sample and each biological replicates (n=2). **c** BJ-RAS<sup>V12</sup> were treated with or without 10 µg/ml doxycycline in the presence or absence of MRE11 inhibitors, Mirin, PFM01 or PFM39. The expression of RAS<sup>V12</sup> was detected by Western blotting. Alpha-tubulin was included as a loading control.

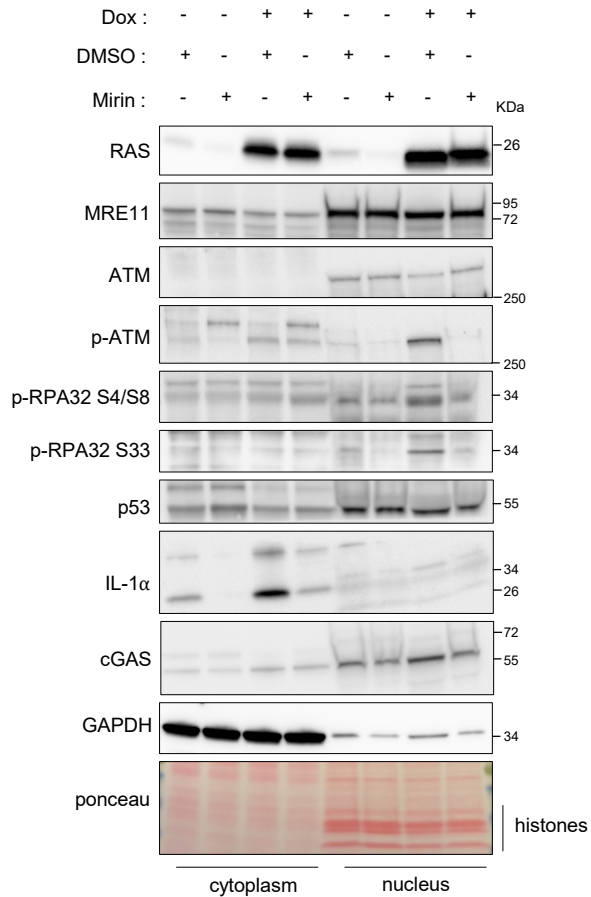

**Supplementary Fig. 5 Effect of Mirin on IL1- $\alpha$  expression in BJ-RAS<sup>V12</sup> fibroblasts.** Protein levels of the SASP factor IL1- $\alpha$  and of other indicated factors were analyzed by Western blot in BJ fibroblasts overexpressing (+Dox) or not (-Dox) RAS<sup>V12</sup> and treated or not with 10  $\mu$ M Mirin for 8 days. Cytosolic and nuclear fractions were collected and processed for immunoblotting assay. GAPDH and Ponceau staining are shown as fractionation and loading controls.

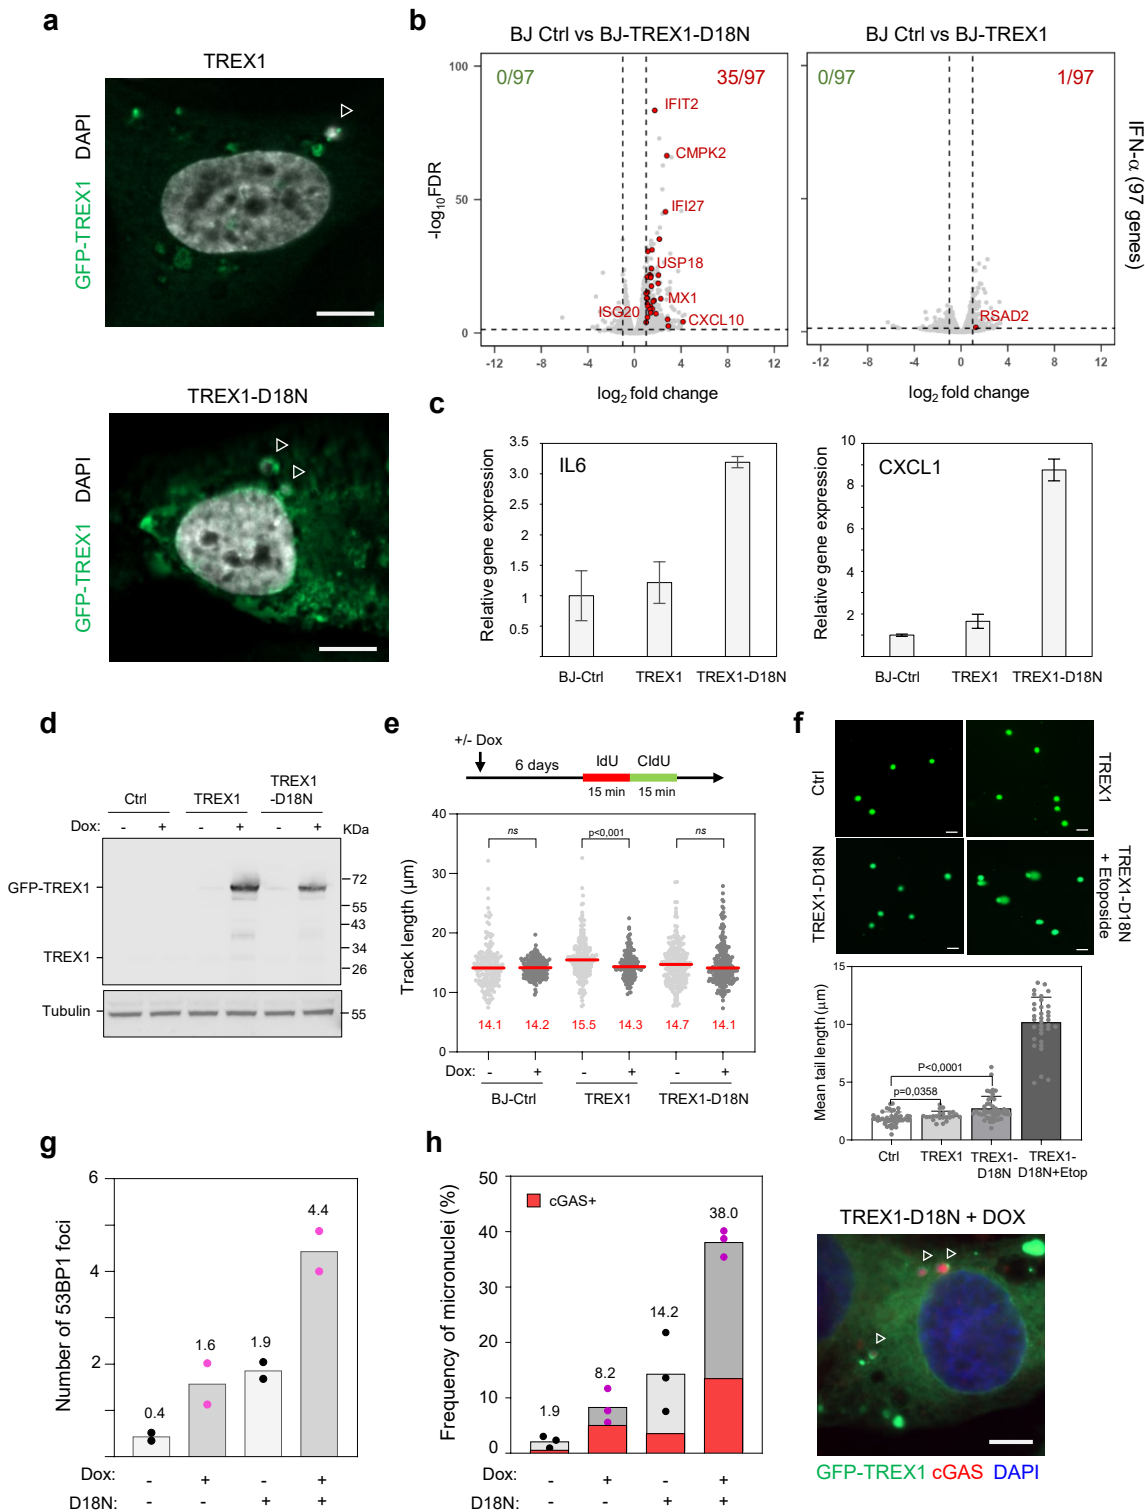

**Supplementary Fig. 6 TREX1 regulates the IFN response in BJ-RAS<sup>V12</sup> fibroblasts.**

**a** GFP-TREX1 colocalizes with micronuclei. Representative images from two independent experiments are shown. Scale bar: 5  $\mu$ m. **b** Volcano plots of differentially expressed IFN- $\alpha$  response genes in non-induced BJ-RAS cells (BJ-Ctrl) compared to cells overexpressing either TREX1 or TREX1-D18N. RNA-seq samples were processed and analyzed as indicated in Fig. 1c. **c** RT-qPCR analysis of *IL6* and *CXCL1* gene expression in indicated cell lines. Mean  $\pm$  SD of one representative experiment is shown (n=3). **d** Parental BJ-hTERT fibroblasts or BJ-hTERT harboring tetracycline-inducible TREX1 or TREX1-D18N were treated or not with 4  $\mu$ g/ml doxycycline. The expression of EGFP-TREX1 was detected by Western blotting. Alpha-tubulin was included as a loading control. **e** Overexpression of TREX1 or TREX1-D18N does not affect replication fork progression. BJ fibroblasts expressing tetracycline-inducible TREX1 or the dominant negative mutant D18N were treated or not with 4  $\mu$ g/ml doxycycline for 6 days. Replication fork progression was measured by DNA fiber spreading. Median IdU+CldU track length is shown in red. The p value was determined using two-tailed Mann-Whitney rank sum test. *ns*: not significant. A representative experiment is shown (n=3). **f** Overexpression of TREX1 or TREX1-D18N induces detectable levels of chromosome breaks. BJ fibroblasts expressing tetracycline-inducible TREX1 or the dominant negative mutant D18N were treated or not with 4  $\mu$ g/ml doxycycline for 8 days followed by alkaline comet assay. Treatment with 20  $\mu$ M etoposide for 5 hours was included as a positive control. Representative images from two independent experiments are shown. Scale bar: 20  $\mu$ m. At least 30-50 nuclei were measured for each sample. Mean tail length and SD are shown (n=2). The p values were determined using two-tailed Mann-Whitney rank sum test. **g** Number of 53BP1 foci in cells overexpressing RAS<sup>V12</sup> and the dominant negative mutant of TREX1 (TREX1-D18N; n=2). **h** Frequency of micronuclei in cells overexpressing RAS<sup>V12</sup> and/or TREX1-D18N (n=3). The localization of cGAS was determined by immunofluorescence. The frequency of cGAS+ micronuclei in BJ cells overexpressing RAS<sup>V12</sup> and/or the TREX1-D18N mutant is shown in red (n=2). A representative image showing cGAS-positive micronuclei (arrowheads) is shown. Scale bar is 5  $\mu$ m.



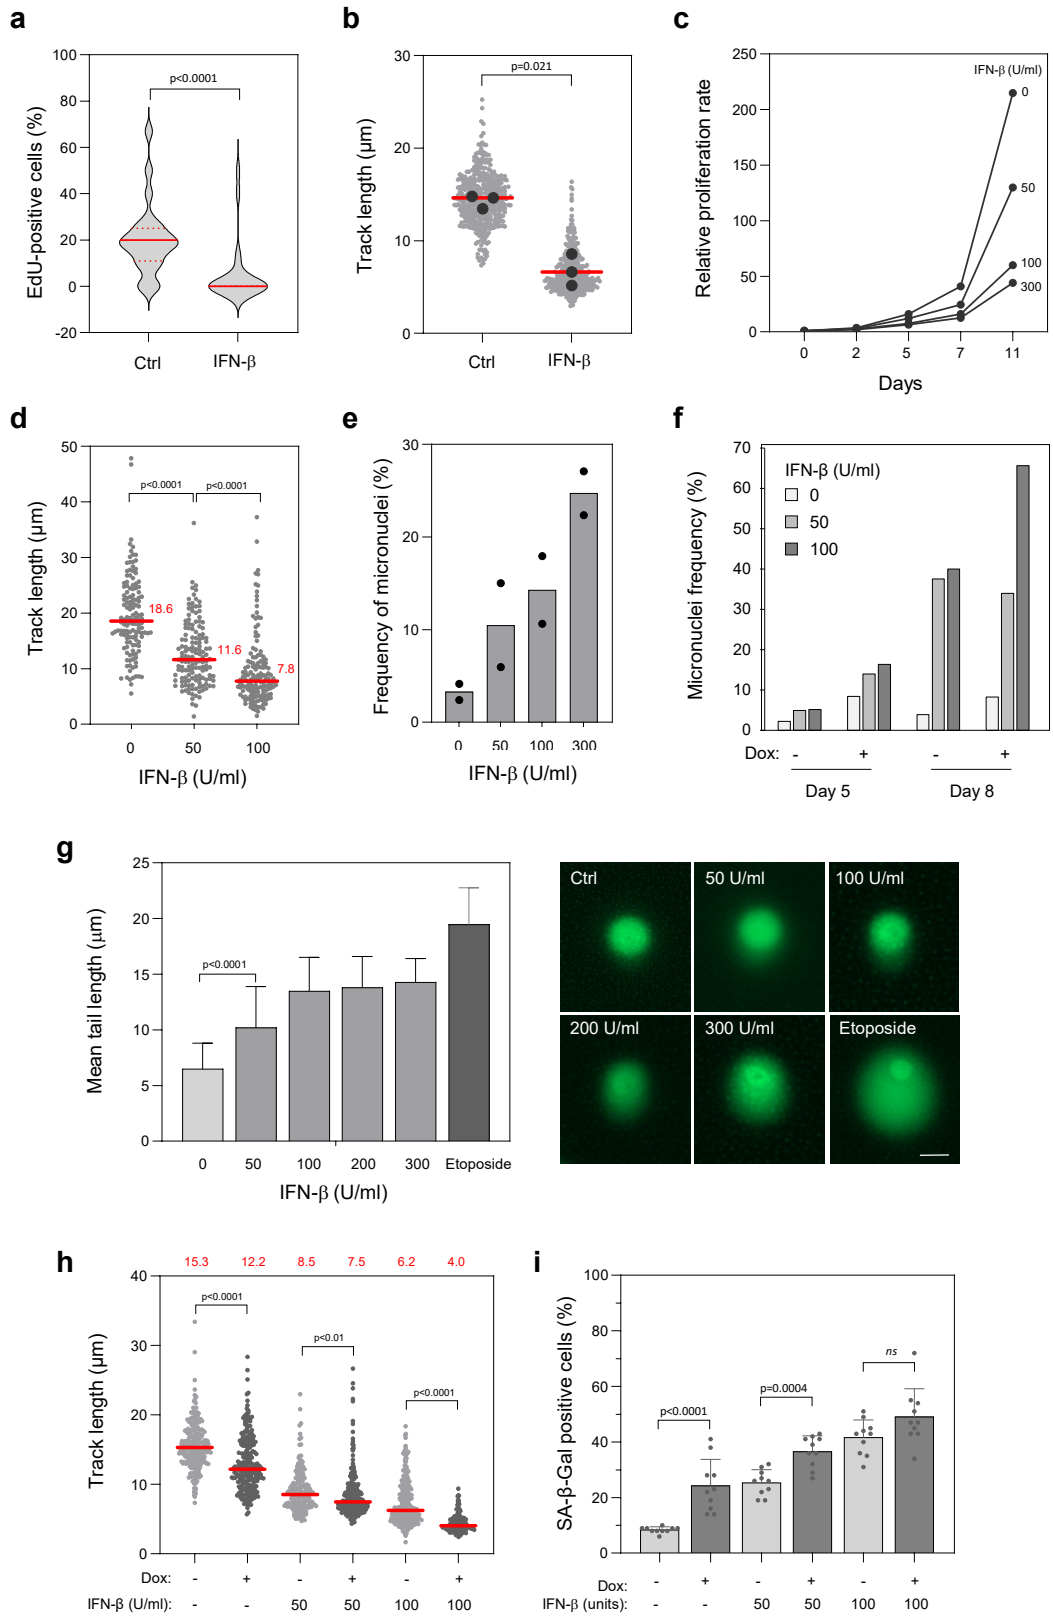

**Supplementary Fig. 7 IFN- $\beta$  induces growth inhibition, DNA breaks and micronuclei.** Interferon- $\beta$  treatment inhibits cell proliferation and induces senescence, fork slowdown and micronuclei formation in hTERT-immortalized IMR90 fibroblasts and RPE-1 cells. **a** IMR90 fibroblasts were treated with 50 U/ml of IFN- $\beta$  for 6 days. Inhibition of DNA replication by IFN- $\beta$  was monitored by EdU click chemistry. Percentage of EdU-positive cells was quantified. A representative experiment is shown (n=2).  $p < 0.0001$ , two-tailed Mann-Whitney rank sum test. **b** Replication fork progression was monitored by DNA fiber spreading on day 6 in IMR90 cells treated or not with 50 U/ml IFN- $\beta$ . The median of 3 independent experiments is indicated in red, two-tailed paired t-test. **c** Human telomerase-immortalized retinal pigment epithelial hTERT-RPE-1 cells were treated or not with increasing doses of IFN- $\beta$ . Cell number was counted at the indicated time points. A summary of three independent experiments is shown. **d** Replication fork progression was monitored by DNA fiber spreading 8 days after IFN- $\beta$  treatment. Median IdU+CldU track length is indicated in red (n=1).  $p < 0.0001$ , two-tailed Mann-Whitney rank sum test. **e** Frequency of micronuclei in cells supplemented with either 50 or 100 U/ml IFN- $\beta$  for 8 days. The mean of two independent experiments is shown. **f** Frequency of micronuclei in BJ-RAS<sup>V12</sup> cells treated or not with 10  $\mu$ g/ml Doxycycline and IFN- $\beta$  for 5 to 8 days. A representative experiment is shown. **g** IFN- $\beta$  treatment induces chromosome breaks in hTERT-immortalized RPE-1 cells. Human hTERT-RPE-1 cells were treated for 6 days with increasing doses of IFN- $\beta$ . Comet assay was performed under alkaline conditions and tail length was measured using the MetaMorph software. At least 30-50 nuclei were measured for each sample. Mean tail length and SD are shown (n=1).  $p < 0.0001$ , two-tailed Mann-Whitney rank sum test. **h** IFN- $\beta$  significantly enhances RAS<sup>V12</sup>-induced fork slowdown. BJ-RAS<sup>V12</sup> fibroblasts were treated or not with 10  $\mu$ g/ml doxycycline and IFN- $\beta$  for 6 days. Replication fork progression was measured by DNA fiber spreading. Median IdU+CldU track length is indicated in red. The p values were determined using two-tailed Mann-Whitney rank sum test. A representative experiment from two biological replicates is presented. **i** IFN- $\beta$  enhances RAS<sup>V12</sup>-induced senescence. BJ-RAS<sup>V12</sup> fibroblasts were treated or not with 10  $\mu$ g/ml doxycycline and IFN- $\beta$  for 6 days. SA-b-gal activity was stained. Percentage of SA-b-gal-positive cells was scored. A representative experiment is shown (n=2). The p values were determined using two-tailed Mann-Whitney rank sum test. *ns*: non-significant.

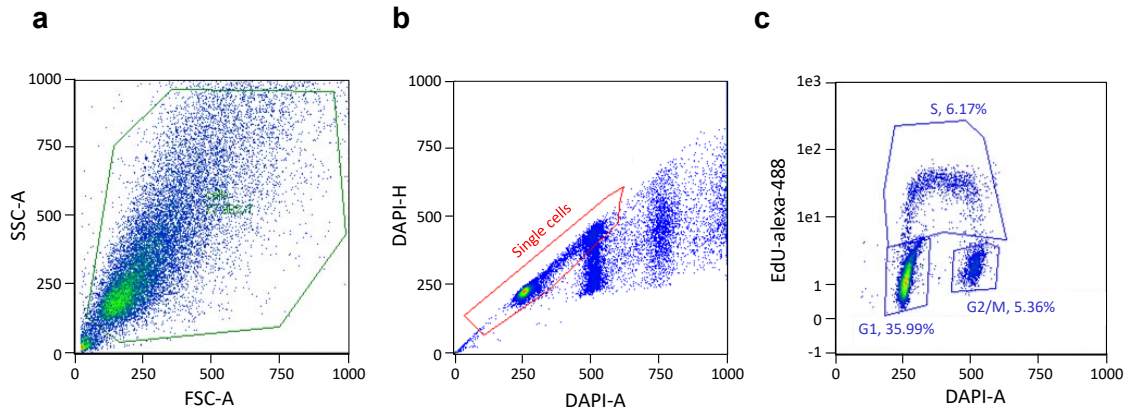

**Supplementary Fig. 8 Flow cytometry gating strategy.** **a** Selection of viable cells according to FSC and SSC. **b** Single cell gating based on the DNA content. **c** Percentage of cells in S phase was quantified according to the EdU-Alexa-488 fluorescence.
